# Supplementary material
Source: PubMed Central journal article supplement (PMC208837)

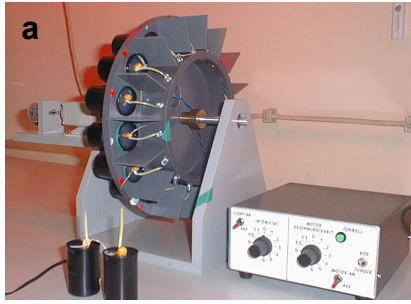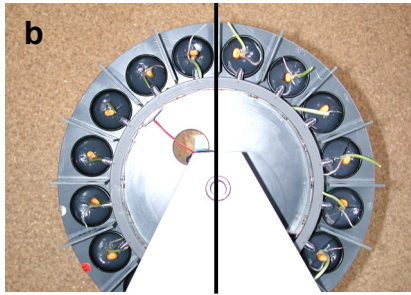

Supplement: pnas_100_20_11795__2.pdf [file pnas_100_20_11795__2.pdf]

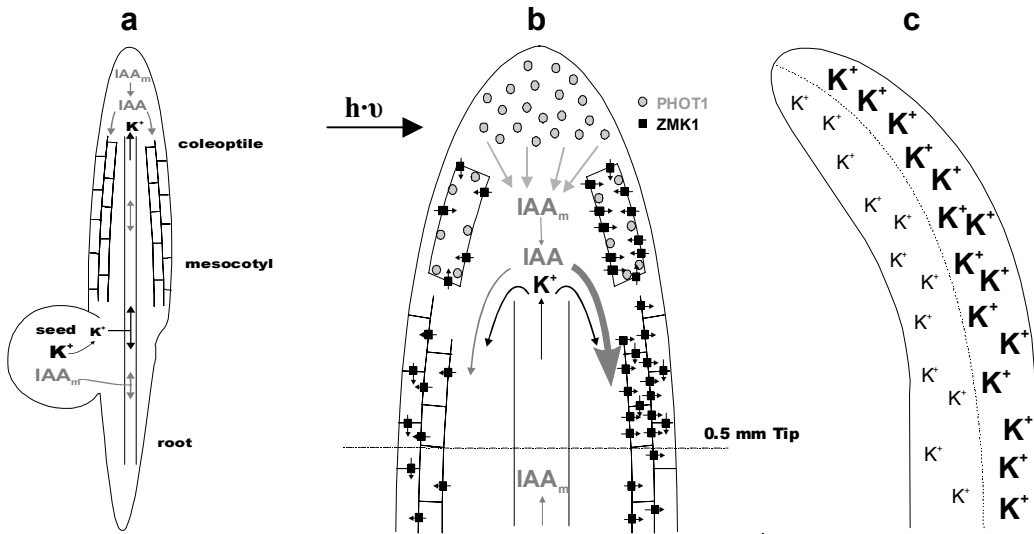

Supplement: pnas_100_20_11795__4.pdf [file pnas_100_20_11795__4.pdf]
